# Supplementary material for: Effect of high molecular weight hyaluronic acid on chondrocytes cultured in collagen/hyaluronic acid porous scaffolds
Source: Royal Society of Chemistry journal article supplement (doi:10.1039/c5ra18755a), 2015-01-01
Supplement: c5ra18755a1.pdf [file c5ra18755a1.pdf]

## Supplementary information

### **Effect of High Molecular Weight Hyaluronic Acid on Chondrocytes Cultured in Collagen/Hyaluronic Acid Porous Scaffolds**

Shangwu Chen,<sup>a,b</sup> Qin Zhang, PhD,<sup>a,b</sup> Naoki Kawazoe, PhD,<sup>b</sup> and Guoping Chen, PhD<sup>a,b\*</sup>

<sup>a</sup>Tissue Regeneration Materials Unit, International Center for Materials Nanoarchitectonics, National Institute for Materials Science, 1-1 Namiki, Tsukuba, Ibaraki 305-0044, Japan

<sup>b</sup>Department of Materials Science and Engineering, Graduate School of Pure and Applied Sciences, University of Tsukuba, 1-1-1 Tennodai, Tsukuba, Ibaraki 305-8571, Japan

#### **Corresponding Author**

\* Fax: +81-29-860-4706; Tel: +81-29-860-4496; E-mail: Guoping.Chen@nims.go.jp; Postal address: Tissue Regeneration Materials Unit, International Center for Materials Nanoarchitectonics, National Institute for Materials Science, 1-1 Namiki, Tsukuba, Ibaraki 305-0044, Japan.

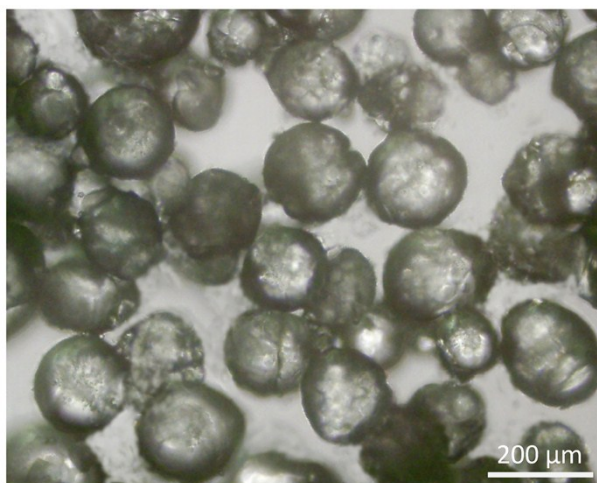

Fig. S1. Ice particulates with the diameter of 150-250 μm.

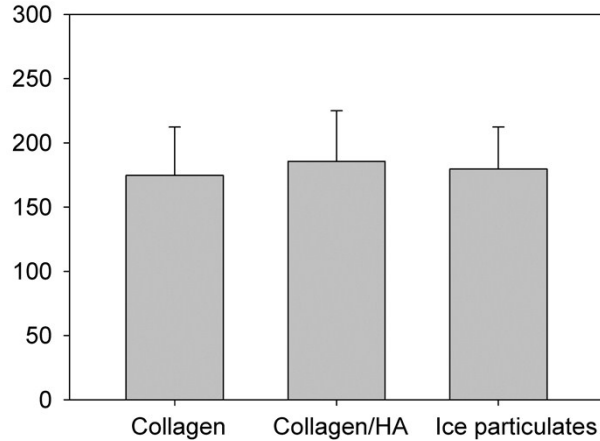

Fig. S2. The pore size of collagen scaffolds or collagen/HA scaffolds, and the diameter of ice particulates used for scaffold preparation ( $\mu\text{m}$ ). Means  $\pm$  SD,  $N \geq 60$ . There was no significant statistical difference among the data of three groups.

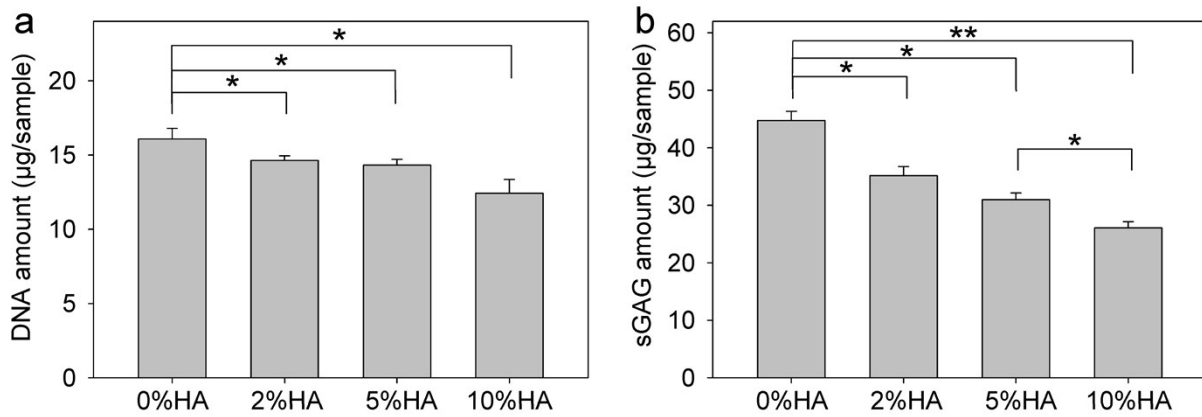

Fig. S3. The DNA amount (a) and sGAG amount (b) of cell/scaffold constructs from collagen/HA scaffolds that had different ratios of HA (0%, 2%, 5% or 10%). Bovine articular chondrocytes were cultured on these scaffolds for 2 weeks before the analysis. Means  $\pm$  SD,  $N = 4$ . \*,  $p < 0.05$ ; \*\*,  $p < 0.01$ .
